# Supplementary material
Source: Springer Nature journal article supplement (https://www.springermedizin.de/resource/supplementary/12998_2012_62_MOESM2_ESM.pdf/9680080)

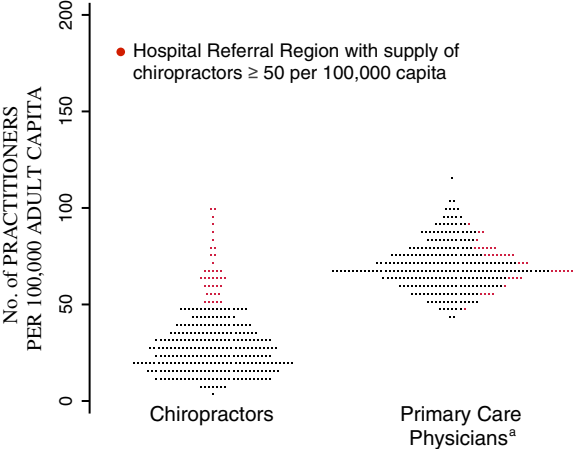

Pearson's R: 1.0 (Reference)

Mean: 41.2

Median: 36.6

IQR: 27.3

0.17<sup>\*\*</sup>

75.3

74.0

15.7

Supplement: MOESM2 [file 9680080]
